## PERSPECTIVAS

### EDITORIALES

**407** Perspectiva sobre los inhibidores selectivos de la recaptación de serotonina en niños y adolescente

*Daniel S. Pine, M.D., Robert Freedman, M.D.*

**409** Una cruel ironía para los clínicos que tratan la depresión

*Stephen R. Marder, M.D., Michael J. Gitlin, M.D.*

**411** Análisis del registro sueco del divorcio y el trastorno por consumo de alcohol resalta las relaciones sociales como un objetivo para la psiquiatría preventiva y la investigación genética

*Leah S. Richmond-Rakerd, M.A., Daniel W. Belsky, Ph.D.*

**414** Progreso actual en el tratamiento con opiáceos

*George E. Woody, M.D.*

**417** Farmacogenética de los antidepresivos

*Ajeet B. Singh, M.D., Ph.D., Chad A. Bousman, Ph.D.*

### INTROSPECCIÓN

**419** «Te oigo»

*Caren J. Blacker, B.M.B.Ch.*

### TRATAMIENTO EN PSIQUIATRÍA

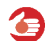

**421** El papel de los niveles plasmáticos de los antipsicóticos en el tratamiento de la esquizofrenia

*Marcela Horvitz-Lennon, M.D., M.P.H., et al.* **GUÍAS CLÍNICAS**

### PERSPECTIVAS EN SALUD MENTAL GLOBAL

**427** [On the Magical Thinking Related to Mental Health in Chad]

*Rami Bou Khalil, M.D., M.Sc.*

### IMÁGENES EN PSIQUIATRÍA

**429** El suicidio de Saul (1562)—Pieter Brueghel el Viejo

*Luca Cambioli, M.D., Michele Augusto Riva, M.D., Ph.D.*

### RESÚMENES Y RESEÑAS

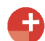

**430** Eficacia de los antidepresivos para la depresión en niños y adolescentes: Estudios financiados por la industria y por el NIMH

*John T. Walkup, M.D.* **EDITORIAL • EMC • AUDIO • VIDEO • GUÍAS CLÍNICAS**

## NUEVAS INVESTIGACIONES

### ARTÍCULOS

**438** Morbilidad y mortalidad asociadas con medicamentos utilizados en el tratamiento de la depresión: Un análisis de casos reportados en los centros de control de intoxicación de los EE.UU, 2000–2014

*J. Craig Nelson, M.D., Daniel A. Spyker, Ph.D., M.D.* **EDITORIAL • EMC • AUDIO • VIDEO • GUÍAS CLÍNICAS**

**451** Divorcio e inicio del trastorno por consumo de alcohol: Un estudio sueco longitudinal de cohorte, correlativo, basado en la población

*Kenneth S. Kendler, M.D., et al.* **EDITORIAL • EMC • AUDIO • GUÍAS CLÍNICAS**

**459** Inducción de naltrexona inyectable de acción prolongada: Un ensayo aleatorizado de desintoxicación de pacientes ambulatorios con naltrexona versus buprenorfina

*Maria Sullivan, M.D., Ph.D., et al.* **EDITORIAL • AUDIO • GUÍAS CLÍNICAS**

**468 Variantes del gen transportador de norepinefrina y remisión de la depresión con tratamiento con venlafaxina en adultos mayores**

Victoria S. Marshe, H.B.Sc., et al. EDITORIAL • GUÍAS CLÍNICAS

**476 KINECT 3: Un ensayo de fase 3, aleatorizado, doble ciego, controlado con placebo de valbenazina (NBI-98854) para la diskinesia tardía**

Robert A. Hauser, M.D., M.B.A., et al. AUDIO • GUÍAS CLÍNICAS

**COMUNICADOS Y ACTUALIZACIONES**

**CARTAS AL EDITOR**

**485 [Citalopram Discontinuation More Harmful Than Gradual Dosage Reduction?]**

Petrus J.C. Krijnsen, M.D., et al.

**485 [Clarifying Methods in a Study of Outcomes of Citalopram Dosage Risk Mitigation in a Veteran Population: Response to Krijnsen et al.]**

Thomas S. Rector, Ph.D., Pharm.D.

**486 [Internet Gaming Disorder Within the DSM-5 Framework and With an Eye Toward ICD-11]**

Yuan-Wei Yao, B.S., et al.

**487 [Open Scientific Practices Are the Way Forward for Internet Gaming Disorder Research: Response to Yao et al.]**

Andrew K. Przybylski, Ph.D., et al.

**RESEÑAS BIBLIOGRÁFICAS**

**488 [Women in Academic Psychiatry: A Mind to Succeed]**

Sophia Vinogradov, M.D.

**489 [Improving Mental Health: Four Secrets in Plain Sight]**

Noa Heiman, Ph.D.

**490 [Our Most Troubling Madness: Case Studies in Schizophrenia Across Cultures]**

Etheldreda Nakimuli-Mpungu, M.Med.(Psych), Ph.D.

**490 [Robert Lowell, Setting the River on Fire: A Study of Genius, Mania, and Character]**

Gordon B. Parker, M.D., Ph.D.

**492 Books Received**

**ACTOS OFICIALES**

**493 Mejoramiento de la calidad en neurología: Actualización de la medición de la calidad del manejo de la demencia**

**OTROS TEMAS DE INTERÉS**

**499 Educación Médica Continuada**

**Cubierta:** [Walkup (p. 430) addresses the historical and scientific issues contributing to a controversy over the evidence for effectiveness of antidepressants in children. He reviews the strong justification for using antidepressants that NIMH-funded treatment studies of pediatric depression have provided and compares these results to findings from the initial industrial trials. (Image: Shutterstock)]

Article content that addresses **Core Competencies**, defined by the Accreditation Council of Graduate Medical Education and the American Board of Medical Specialties, is indicated by the following symbols:

-  Professionalism
-  Patient Care and Procedural Skills
-  Medical Knowledge
-  Practice-Based Learning and Improvement
-  Interpersonal and Communication Skills
-  Systems-Based Practice.

More information is available at [www.abms.org/maintenance\\_of\\_certification/MOC\\_competencies.aspx](http://www.abms.org/maintenance_of_certification/MOC_competencies.aspx)

**AUDIO** Highlighted in AJP Audio, a downloadable .mp3 file available at [ajp.psychiatryonline.org](http://ajp.psychiatryonline.org)

**EMC** A course covering the content of this article is available online for paid subscribers to the AJP EMC Course program

**EDITORIAL** Discussed in one of the issue's editorials

**GUÍAS CLÍNICAS** Guías clínicas provided on the English table of contents

**VIDEO** Highlighted online by Deputy Editor Daniel S. Pine, M.D.

**La Tabla de Contenidos y resúmenes de Este Número Está Disponible en Español**

(This issue's Table of Contents and abstracts are available in Spanish)

Translation presented in collaboration with the Office of Global Health, Rutgers-Robert Wood Johnson Medical School

Support for this effort provided by ACTA Colombia.

**Translation courtesy of**

**Sergi Casals, M.A.**, Garuna, Medellín, Colombia ([www.garunaeditors.com](http://www.garunaeditors.com))

**Carlos Lopez Jaramillo, M.D.**, Universidad de Antioquia, Medellín, Colombia

**Javier I. Escobar, M.D., M.Sc.**, Rutgers-Robert Wood Johnson Medical School

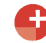

## Eficacia de los antidepresivos para la depresión en niños y adolescentes: Estudios financiados por la industria y por el NIMH

John T. Walkup, M.D.

Existe una gran controversia en torno a la eficacia de los antidepresivos más recientes para niños y adolescentes con depresión. La controversia gira alrededor de meta-análisis de estudios que sugieren que los antidepresivos tienen una eficacia mínima, son inefectivos o equivalentes al placebo. En esta reseña, el autor analiza varias complejidades científicas y clínicas que es importante comprender cuando se revisa la literatura de los antidepresivos: las fortalezas y debilidades de los meta-análisis; el contexto científico y legislativo para el alto número de ensayos con antidepresivos a finales de los 1990 y principios de los 2000; y la distinción entre un ensayo negativo, en el que el tratamiento no demuestra eficacia, y un ensayo fallido, en el que debido a problemas metodológicos es imposible sacar ninguna conclusión sobre la eficacia. La premisa de esta reseña es que los meta-análisis que incluyen el gran número de ensayos con antidepresivos financiados por la industria distorsionan la imagen de la eficacia de los antidepresivos para la depresión en adolescentes. Los ensayos financiados por la industria sobre la depresión en niños y

adolescentes adolecen de varias dificultades para su implementación y deberían ser considerados ensayos fallidos que en su mayor parte no son informativos ni elegibles para ser incluidos en meta-análisis de eficacia. A diferencia de los ensayos financiados por la industria, los ensayos de depresión financiados por el Instituto Nacional Estadounidense de Salud Mental (NIMH, por sus siglas en inglés) (N=2) se caracterizan por muchas fortalezas metodológicas, tasas inferiores de respuesta al placebo (30%–35%), y diferencias entre grupos relevantes (25%–30%) que apoyan la eficacia de los antidepresivos. Los ensayos financiados por el NIMH, considerados conjuntamente con la eficacia demostrada de los inhibidores de recaptación de serotonina para los trastornos de ansiedad y el trastorno obsesivo-compulsivo de inicio en la infancia, sugieren que los medicamentos antidepresivos en enfermedades internalizantes pediátricas juegan un papel muy importante y de amplio alcance.

*(Am J Psychiatry 2017; 174:430–437)*

# Morbilidad y mortalidad asociadas con medicamentos utilizados en el tratamiento de la depresión: Un análisis de casos reportados en los centros de control de intoxicación de los EE.UU, 2000–2014

J. Craig Nelson, M.D., Daniel A. Spyker, Ph.D., M.D.

**Objetivo:** Los autores se propusieron determinar la morbilidad y la mortalidad relativas asociadas con medicamentos utilizados para tratar la depresión y examinar efectos clínicos específicos asociados con resultados graves.

**Método:** Los autores solicitaron al Sistema Nacional Estadounidense de Datos de Intoxicaciones, que recibe informes de exposición de centros de intoxicación regionales en Estados Unidos, Puerto Rico y el Distrito de Columbia, que les facilitarían los casos de exposiciones a un solo medicamento en individuos de 12 años o más durante el período 2000–2014. Los medicamentos incluían antidepresivos, antipsicóticos atípicos, anticonvulsivantes, litio y otros medicamentos utilizados en el tratamiento de la depresión. Los principales resultados fueron el índice de morbilidad (el número de resultados graves por 1.000 exposiciones) y el índice de mortalidad (el número de resultados fatales por 10.000 exposiciones).

**Resultados:** Durante este periodo de 15 años hubo 962.222 exposiciones a por lo menos uno de los 48 medicamentos estudiados. Las consecuencias de gravedad aumentaron 2,26

veces y de manera lineal a lo largo de los 15 años. Mientras que los medicamentos tricíclicos e inhibidores de monoamino oxidasa se asociaron con una alta morbilidad y mortalidad, varios de los nuevos agentes también resultaron peligrosos. El litio, la quetiapina, la olanzapina, el bupropión y la carbamazepina se asociaron con altos índices de morbilidad. El litio, la venlafaxina, el bupropión, la quetiapina, la olanzapina, la ziprasidona, el ácido valproico, la carbamazepina y el citalopram se asociaron con índices más altos de mortalidad.

**Conclusiones:** Las complicaciones serias luego de sobredosis o exposiciones no intencionadas a medicamentos utilizados para tratar la depresión han aumentado drásticamente en los últimos 15 años. Los datos actuales sugieren que los riesgos de morbilidad y mortalidad varían substancialmente entre estos medicamentos. Estas diferencias se vuelven importantes para seleccionar tratamientos para pacientes con depresión, especialmente aquellos con riesgo de suicidio.

*(Am J Psychiatry 2017; 174:438–450)*

# Divorcio e inicio del trastorno por consumo de alcohol: Un estudio sueco longitudinal de cohorte, correlativo, basado en la población

Kenneth S. Kendler, M.D., Sara Larsson Lönn, Ph.D., Jessica Salvatore, Ph.D., Jan Sundquist, M.D., Ph.D., Kristina Sundquist, M.D., Ph.D.

**Objetivo:** El propósito de este estudio fue aclarar la magnitud y la naturaleza de la relación entre el divorcio y el riesgo de trastorno por consumo de alcohol (TCA).

**Método:** En una muestra sueca de individuos casados (N=942.366), basada en la población, los autores examinaron la asociación entre el divorcio o la viudez y el riesgo de primer registro por TCA. El TCA se evaluó utilizando registros médicos, legales y farmacéuticos.

**Resultados:** El divorcio se encontró fuertemente asociado con el riesgo del primer inicio de TCA tanto en hombres (cociente de riesgo=5,98; IC 95%=5,65–6,33) como para mujeres (cociente de riesgo=7,29; IC 95%=6,72–7,91). Estimados del cociente de riesgo de inicio de TCA después del divorcio en gemelos monocigóticos discordantes fueron 3,45 y 3,62 respectivamente en hombres y mujeres. El divorcio también se asoció con la recurrencia de TCA en aquellos con registros de TCA antes del matrimonio. Además, la viudez aumentó el riesgo de TAC en hombres (cociente de riesgo=3,85; IC 95%=2,81–5,28) y mujeres (cociente de ries-

go=4,10; IC 95%=2,98–5,64). En los individuos divorciados, casarse nuevamente se asoció con una gran disminución de TCA en ambos sexos (hombres: cociente de riesgo=0,56; IC 95%=0,52–0,64; mujeres: cociente de riesgo=0,61; IC 95%=0,55–0,69). El divorcio causó un mayor aumento de inicio por primera vez de TAC en aquellos con un historial familiar de TAC o con factores externalizantes previos.

**Conclusiones:** La pérdida del cónyuge por motivo de divorcio o fallecimiento está asociada con un riesgo alto y duradero aumentado de TAC. Esta asociación probablemente refleja procesos tanto causales como no causales. Que el estatus TAC del cónyuge altere esta asociación resalta la importancia de las características del cónyuge para las consecuencias de la pérdida del cónyuge en la salud comportamental. El aumento pronunciado del riesgo de TAC después del divorcio o la viudez, y el efecto protector de casarse nuevamente contra un subsiguiente TAC refleja el profundo impacto del matrimonio en el consumo problemático de alcohol.

(*Am J Psychiatry* 2017; 174:451–458)

# Inducción de naltrexona inyectable de acción prolongada: Un ensayo aleatorizado de desintoxicación de pacientes ambulatorios con naltrexona versus buprenorfina

Maria Sullivan, M.D., Ph.D., Adam Bisaga, M.D., Martina Pavlicova, Ph.D., C. Jean Choi, M.S., Kaitlyn Mishlen, M.A., Kenneth M. Carpenter, Ph.D., Frances R. Levin, M.D., Elias Dakwar, M.D., John J. Mariani, M.D., Edward V. Nunes, M.D.

**Objetivo:** Actualmente no existe ningún enfoque establecido que sirva para hacer la transición de adultos dependientes de los opiáceos a la naltrexona por inyección, de acción prolongada (XR naltrexona), al mismo tiempo previniendo la recaída. Los autores realizaron un ensayo para examinar la eficacia de dos métodos de desintoxicación de opiáceos de pacientes ambulatorios para la inducción de la XR naltrexona.

**Método:** Los participantes fueron 150 adultos dependientes de los opiáceos, que fueron asignados aleatoriamente 2:1 a uno de dos regímenes de desintoxicación de pacientes ambulatorios: desintoxicación asistida con naltrexona o desintoxicación asistida con buprenorfina, seguidos de una inyección de XR naltrexona. La desintoxicación asistida con naltrexona duraba 7 días e incluía un solo día de buprenorfina seguido por dosis crecientes de naltrexona oral junto con lornidina y otros medicamentos adyuvantes. La desintoxicación asistida con buprenorfina incluía un periodo de 7 días de disminución de buprenorfina, seguidos de un fin de semana sin medicación antes de la administración de XR-naltrexona, de acuerdo con la información oficial de prescripción de la naltrexona. Los participantes de ambos grupos recibieron terapia comportamental centrada en la adherencia al medicamento y una segunda dosis de XR-naltrexona.

**Resultados:** En comparación con los participantes en el grupo de desintoxicación asistida con buprenorfina, los participantes asignados a la desintoxicación asistida con naltrexona mostraron una probabilidad más alta de ser inducidos exitosamente a la XR-naltrexona (56,1% comparado con 32,7%) y de recibir la segunda inyección en la quinta semana (50,0% comparado con 26,9%). Ambos modelos se ajustaron para el consumo de opiáceos de tipo primario, la ruta de administración de los opiáceos y los equivalentes a la morfina al inicio del estudio.

**Conclusiones:** Estos resultados demuestran la seguridad, eficacia y tolerabilidad de la naltrexona en dosis bajas, en conjunto con un solo día de dosis de buprenorfina y medicamentos no-opiáceos adyuvantes, para iniciar la XR-naltrexona en adultos con dependencia de los opiáceos. Esta estrategia ofrece una alternativa prometedora a las altas tasas de atrición y recaídas que actualmente se observan con la disminución de antagonistas en entornos de pacientes tanto internos como ambulatorios.

*(Am J Psychiatry 2017; 174:459–467)*

# Variantes del gen transportador de norepinefrina y remisión de la depresión con tratamiento con venlafaxina en adultos mayores

Victoria S. Marshe, H.B.Sc., Malgorzata Maciukiewicz, Ph.D., Soham Rej, M.D., M.Sc., Arun K. Tiwari, Ph.D., Etienne Sibille, Ph.D., Daniel M. Blumberger, M.D., M.Sc., Jordan F. Karp, M.D., Eric J. Lenze, M.D., Charles F. Reynolds III, M.D., James L. Kennedy, M.D., M.Sc., Benoit H. Mulsant, M.D., M.S., Daniel J. Müller, M.D., Ph.D.

**Objetivo:** El objetivo primario de este estudio fue investigar cinco variantes putativamente funcionales del gen transportador de norepinefrina (*SLC6A2 NET*), y el gen transportador de serotonina (*SLC6A4 SERT*) y la remisión en pacientes mayores tratados con venlafaxina. Un objetivo secundario fue analizar otras 17 variantes en genes de sistemas serotoninérgicos (*HTR1A*, *HTR2A*, *HTR1B*, *HTR2C*, *TPH1*, *TPH2*) potencialmente involucrados en el mecanismo de acción de la venlafaxina.

**Método:** La muestra incluía 350 adultos de 60 años o más con trastorno depresivo mayor, definido según el DSM-IV, y una puntuación de por lo menos 15 en la Escala de Evaluación de la Depresión de Montgomery-Åsberg (MADRAS). Los participantes recibieron tratamiento protocolizado con venlafaxina con etiqueta abierta, hasta 300 mg/día, por aproximadamente 12 semanas como parte de un ensayo clínico en tres sedes. Se genotipificó a cada uno de los participantes por 22 polimorfismos en ocho genes, que se evaluaron para estudiar la asociación con la remisión de venlafaxina (una puntuación  $\leq 10$  en la escala MADRAS) y los cambios en la puntuación de la escala MADRAS durante el tratamiento.

**Resultados:** Después de ajustar para comparaciones múltiples, la variante rs2242446 (T-182C) del gen *NET* estuvo asociada de forma significativa con la remisión (*odds ratio*=1,66; IC 95%=1,13–2,42). Los individuos con el genotipo rs2242446 C/C tuvieron más probabilidad de remitir (73,1%) que aquellos con el genotipo C/T (51,8%) o T/T (47,3%). Los individuos con el genotipo C/C también tuvieron un menor tiempo hasta la remisión que aquellos con los genotipos C/T o T/T y tuvieron un porcentaje de cambio mayor en la puntuación de la escala MADRAS desde el inicio del estudio hasta el final del tratamiento (hasta la semana 12).

**Conclusiones:** La variante *NET* rs2242446/T-182C puede servir como biomarcador para predecir la probabilidad de remisión con venlafaxina en adultos mayores con depresión mayor. Estos hallazgos pueden ayudar a optimizar los resultados de los antidepresivos en adultos mayores.

(*Am J Psychiatry* 2017; 174:468–475)

## KINECT 3: Un ensayo de fase 3, aleatorizado, doble ciego, controlado con placebo de valbenazina para la diskinesia tardía

Robert A. Hauser, M.D., M.B.A., Stewart A. Factor, D.O., Stephen R. Marder, M.D., Mary Ann Knesevich, M.D., Paul M. Ramirez, Ph.D., Roland Jimenez, B.A., Joshua Burke, M.S., Grace S. Liang, M.D., Christopher F. O'Brien, M.D.

**Objetivo:** La diskinesia tardía es un trastorno del movimiento persistente, inducido por los bloqueadores del receptor de la dopamina, incluyendo los antipsicóticos. La valbenazina (NBI-98854) es un inhibidor del transportador 2 de la monoamina vesicular, novedoso y altamente selectivo, que demostró eficacia y tolerabilidad favorables en el tratamiento de la diskinesia tardía en estudios de fase 2. Este estudio de fase 3 siguió evaluando la eficacia, la seguridad y la tolerabilidad de la valbenazina como tratamiento para la diskinesia tardía.

**Método:** Este ensayo de 6 semanas, aleatorizado, doble-cego, y controlado por placebo, incluyó pacientes con esquizofrenia, trastorno esquizo-afectivo o un trastorno del ánimo, que tenían diskinesia tardía moderada o severa. Los participantes fueron asignados aleatoriamente en una proporción 1:1:1 a placebo una vez al día, 40 mg/día de valbenazina, o 80 mg/día de valbenazina. La meta primaria de eficacia fue el cambio desde el inicio del estudio hasta la semana 6 en el grupo de 80 mg/día en comparación con el grupo de placebo en la puntuación para diskinesia en la escala de Movimientos Involuntarios Anormales (AIMS) (ítems 1–7), según el concepto emitido por evaluadores centrales de videos de AIMS, ciegos. Las evaluaciones de seguridad incluyeron el monitoreo de eventos adversos, pruebas de laboratorio, ECG y medidas físicas.

**Resultados:** La población incluida bajo la intención de tratamiento consistía en 225 participantes, de los cuales 205 completaron el estudio. Aproximadamente el 65% de los participantes tenían esquizofrenia o trastorno esquizo-afectivo, y el 85,5 % estaban recibiendo antipsicóticos concomitantes. El cambio de la media de mínimos cuadrados desde el inicio del estudio hasta la semana 6 en la puntuación de diskinesia en la escala AIMS fue 23,2 para el grupo de 80 mg/día, en comparación con 20,1 para el grupo placebo, una diferencia significativa. La puntuación de diskinesia en la escala AIMS también fue reducida en el grupo de 40 mg/día (21,9 comparado con 20,1). La incidencia de los eventos adversos fue consistente con estudios anteriores.

**Conclusiones:** La valbenazina una vez al día mejoró de forma significativa la diskinesia tardía en participantes con esquizofrenia, trastorno esquizo-afectivo o trastorno del ánimo subyacentes. La valbenazina fue bien tolerada en general, y el estatus psiquiátrico permaneció estable. Son necesarios ensayos más largos para comprender los efectos a largo plazo de la valbenazina en pacientes con diskinesia tardía.

*(Am J Psychiatry 2017; 174:476–484)*
