# The American Journal of Psychiatry

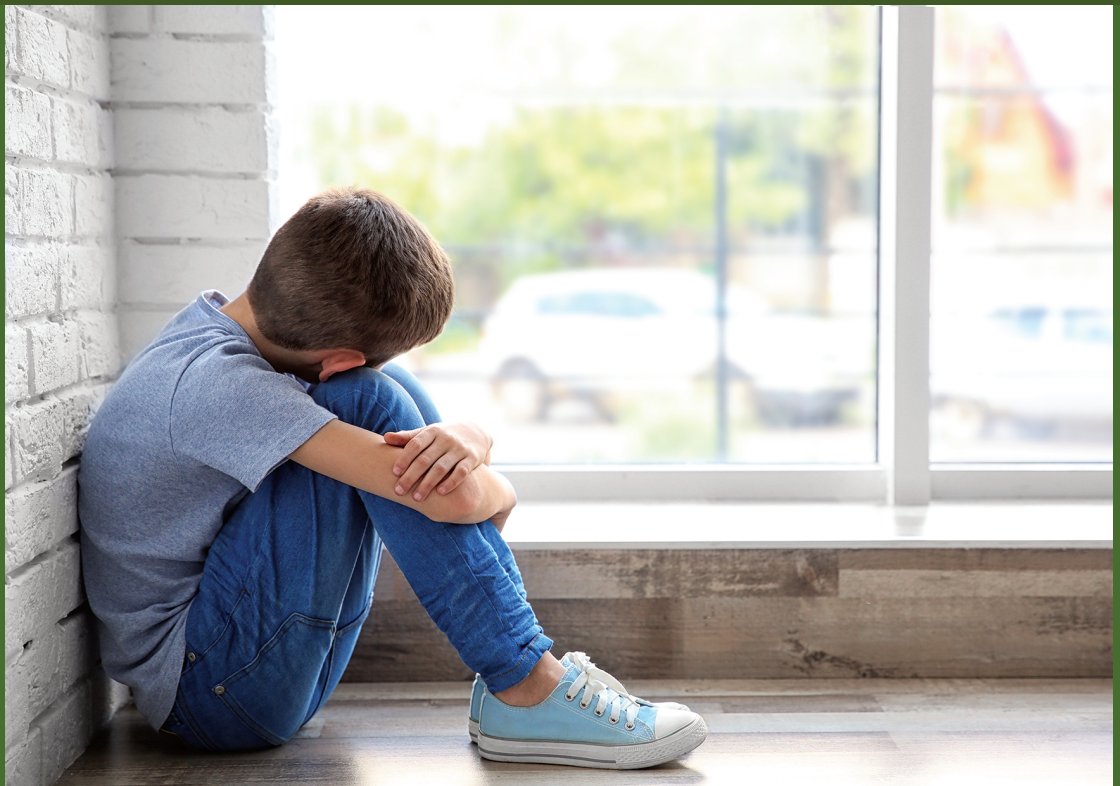

Antidepressant Efficacy for Depression in Children and Adolescents:  
Industry- and NIMH-Funded Studies

The Role of Antipsychotic Plasma Levels in the Treatment of Schizophrenia

Divorce and the Onset of Alcohol Use Disorder: A Swedish  
Population-Based Longitudinal Cohort and Co-Relative Study

Long-Acting Injectable Naltrexone Induction: A Randomized Trial of  
Outpatient Opioid Detoxification With Naltrexone Versus Buprenorphine
